# Supplementary material
Source: Elsevier journal article supplement (https://rcastoragev2.blob.core.windows.net/069e418ee27677ffdb80458d94974cd4/mmc1.pdf)
Supplement: mmc1 [file mmc1.pdf]

**Cell, Volume 184**

## **Supplemental Information**

### **Spatiotemporal analysis of human intestinal development at single-cell resolution**

**David Fawkner-Corbett, Agne Antanaviciute, Kaushal Parikh, Marta Jagielowicz, Ana Sousa Gerós, Tarun Gupta, Neil Ashley, Doran Khamis, Darren Fowler, Edward Morrissey, Chris Cunningham, Paul R.V. Johnson, Hashem Koohy, and Alison Simmons**

**Table S1: Overview of key genes from scRNA-seq data, divided by each cell compartment, that exhibit relatively high or specific expression in each cell types used for characterisation annotation, related to Figure 1** (<sup>a</sup>further sub-division of secretory cells is also shown, <sup>b</sup>Comparison made as proportion of each compartment cells, if cluster is locational specific comparison of time-point difference made only in that location and overall. Locational and time-point differences: Wilcox rank test, p-value <0.05 \*; p-value <0.01 \*\*; p-value <0.01 \*\*\*, p-value <0.001\*\*\*\*)

| Compartment            | Compartment Genes | Cell Type              | Key Genes (Cell Type)                  | Cluster Name (Graph abstraction number) | Key Genes (Cluster)    | Locational Differences              | Time-point Differences <sup>b</sup>          |
|------------------------|-------------------|------------------------|----------------------------------------|-----------------------------------------|------------------------|-------------------------------------|----------------------------------------------|
| Epithelial             | EPCAM, FABP1      | Stem                   | LGR5, ASCL2, MYC                       | Proximal Stem Cells (1)                 | CASP1, GRIA4, PLA2G2A  | Increased in small intestine (****) | No significant differences                   |
|                        |                   |                        |                                        | Distal Stem Cells (2)                   | LEFTY1, PTGDR, SMOC2   | Increased in Colon (****)           | Increases over time in colon and overall     |
|                        |                   | TA                     | MKI67, TOP2A, UBE2C                    | Proximal TA (3)                         | CENPM, TK1, UBE2T      | Increased in small intestine (****) | Decreases over time overall                  |
|                        |                   |                        |                                        | Distal TA (4)                           | HMG3, MND1, TACC3      | Increased in colon (****)           | No significant differences                   |
|                        |                   | Secretory <sup>a</sup> | FOXA2, INSM1, HES6                     | Secretory Progenitors (5-15)            | ISL1, NEUROG3, GHRL    | Increased in small intestine (**)   | No significant differences                   |
|                        |                   |                        |                                        | EECs (5-15)                             | CHGA, TPH1, NEUROD1    | No locational preference            | Increases over time in colon, TI and overall |
|                        |                   |                        |                                        | Goblet cells (5-15)                     | MUC2, SPINK4, WFDC2    | No locational preference            | Increases over time in colon and overall     |
|                        |                   | Absorptive             | FABP2, APOE (proximal), FAM3D (distal) | Proximal Progenitors (16)               | FGG, SOX11, FGB        | Increased in small intestine (**)   | Decreases over time in TI and overall        |
|                        |                   |                        |                                        | Proximal Early Enterocytes (17)         | TF, AFP, VTN           | Increased in small intestine (**)   | No significant differences                   |
|                        |                   |                        |                                        | Proximal Enterocytes (18)               | CCL25, HEBP1, OSR2     | Increased in small intestine (***)  | No significant differences                   |
|                        |                   |                        |                                        | Proximal Mature Enterocytes (19)        | APOC3, ACE, FABP2      | Increased in small intestine (**)   | Increases over time in TI and overall        |
|                        |                   |                        |                                        | Distal Absorptive (20)                  | CA12, HMGCS2, SLC13A2  | Increased in colon (****)           | No significant differences                   |
|                        |                   |                        |                                        | Distal Enterocytes (21)                 | SLC26A2, FABP1, CKB    | Increased in colon (****)           | No significant differences                   |
|                        |                   |                        |                                        | Distal Mature Enterocytes (22)          | AQP8, FABP6, IL32      | Increased in colon (****)           | Increases over time in colon and overall     |
|                        |                   |                        | N/A                                    | BEST4/OTOP2 cells (23)                  | BEST4, OTO2, CA7       | No locational preference            | Increases over time in TI                    |
| Secretory <sup>a</sup> | N/A               | Progenitor             | N/A                                    | NEUROG3+ Progenitor (5)                 | NEUROG3, CLPS, MDK     | N/A                                 |                                              |
|                        |                   | Goblet                 | MUC2, TFF3                             | Goblet 1(6)                             | UBE2C, PBK, MKI67      |                                     |                                              |
|                        |                   |                        |                                        | Goblet 2 (7)                            | TRABD2A, PTGDR, MYC    |                                     |                                              |
|                        |                   |                        |                                        | Goblet 3 (8)                            | SPDEF, WFDC2, ATOH1    |                                     |                                              |
|                        |                   | EEC                    | Cluster specific                       | A-Cells/M-Cells (9)                     | CLEC4G, MLN, GHRL      |                                     |                                              |
|                        |                   |                        |                                        | D-Cells (10)                            | SST, HHEX, PCP4        |                                     |                                              |
|                        |                   |                        |                                        | Enterochromaffin Cells (11)             | TPH1, RXFP4, CHGA      |                                     |                                              |
|                        |                   |                        |                                        | I-Cells (12)                            | CCK, GC, TDO2          |                                     |                                              |
|                        |                   |                        |                                        | L-Cells (13)                            | PYY, GCG, UCN3         |                                     |                                              |
|                        |                   |                        |                                        | N-Cells (14)                            | NTS, HOPX, MEP1A       |                                     |                                              |
|                        |                   | Paneth                 | N/A                                    | Paneth (15)                             | PRSS2, DEFA5, DEFA6    |                                     |                                              |
| Fibroblast             | THY1, COL1A2, VIM | Cycling                | N/A                                    | Fibroblast G2M phase (24)               | CENPF, TOP2A, MKI67    | No locational preference            | Decreases over time in colon, TI and overall |
|                        |                   |                        | N/A                                    | Fibroblast S-Phase (25)                 | PCLAF, TYMS, GINS2     | No locational preference            | Decreases over time in colon, TI and overall |
|                        |                   | Progenitor             | N/A                                    | Fibroblast progenitor (26)              | HMG2, MBP, THY1(low)   | No locational preference            | Decreases over time in colon, TI and overall |
|                        |                   | S1                     | ADAMDEC1, FABP5, CTSC                  | S1 (27)                                 | PDLIM3, COL28A1, TFP12 | Increased in colon (**)             | Increases over time in colon and overall     |
|                        |                   |                        |                                        | S1 COL6A5+ (28)                         | COL6A5, LXN, WNT4      | Increased in small intestine (***)  | Increases over time in TI                    |
|                        |                   |                        |                                        | S1 IFIT3+ (29)                          | IFIT3, CLEC2B, GPX3    | No locational preference            | Increases over time in colon, TI and overall |
|                        |                   | S2                     | FRZB, SOX6, F3                         | Proximal S2 1 (30)                      | NPY, CXCL10, BMP2      | Increased in small intestine (****) | Increases over time in TI                    |
|                        |                   |                        |                                        | Proximal S2 2 (31)                      | MMP11, INSC, BMP3      | Increased in small intestine (****) | No significant differences                   |

|                                   |                                          |               |                              |                                       |                                     |                                  |                                                         |
|-----------------------------------|------------------------------------------|---------------|------------------------------|---------------------------------------|-------------------------------------|----------------------------------|---------------------------------------------------------|
|                                   |                                          |               |                              | Distal S2 (32)                        | <i>POSTN, ALKAL2, WNT5B</i>         | Increased in colon (****)        | Increases over time in colon and overall                |
|                                   |                                          |               |                              | S3 progenitor (33)                    | <i>OSR2, NR2F1, PTN(low)</i>        | No locational preference         | Increases then decreases over time in colon and overall |
|                                   |                                          |               |                              | S3 Transitional (34)                  | <i>GREM1, GDF10, FBLN1</i>          | No locational preference         | Increases over time in colon, TI and overall            |
|                                   |                                          |               |                              | S3 (35)                               | <i>RAMP1, SCN7A, SCUBE2</i>         | No locational preference         | Increases over time in colon, TI and overall            |
|                                   |                                          |               |                              | S3 EBF+ (36)                          | <i>PRRX1, EBF3, EBF2</i>            | Increased in colon (*)           | Increases over time in colon and overall                |
|                                   |                                          |               |                              | S3 HAND1+ (37)                        | <i>COL9A3, DLK1, HAND1</i>          | Increased in colon(*)            | Increases over time in colon and overall                |
|                                   |                                          |               |                              | S4 CXL13+ (38)                        | <i>CXCL13, TNFSF11, CD24</i>        | Increased in small intestine (*) | Increases over time in TI and overall                   |
|                                   |                                          |               |                              | S4 CCL21+ (39)                        | <i>CCL21, OLFM3, PTGDS</i>          | No locational preference         | Increases over time in colon, TI and overall            |
| <b>Myofibroblast /Mesothelium</b> | <i>VIM, FOXF1, TAGLN, RSP02, RGS6(-)</i> | Cycling       | N/A                          | Myofibroblast G2M phase (40)          | <i>MKI67, CENPF, TOP2A</i>          | No locational preference         | No significant differences                              |
|                                   |                                          |               | N/A                          | Myofibroblast S-phase (41)            | <i>PCLAF, TYMS, GINS2</i>           | No locational preference         | Increases over time overall                             |
|                                   |                                          | Myofibroblast | <i>THY1, NKX2-3, ACTG2</i>   | Myofibroblast progenitors(42)         | <i>ADAMDEC1, MFAP4, ADAM28</i>      | No locational preference         | Decreases over time in colon and overall                |
|                                   |                                          |               |                              | Myofibroblasts (43)                   | <i>ACTA2, MYH11, GREM2</i>          | No locational preference         | Increases over time in colon, TI and overall            |
|                                   |                                          | Mesothelium   | <i>MSLN, WT1, RSP01</i>      | Mesothelium <i>IL18+</i> (44)         | <i>IL18, GATA6, WNT10A</i>          | No locational preference         | No significant differences                              |
|                                   |                                          |               |                              | Mesothelium SOX6+ (45)                | <i>SOX6, HPGD, STX2</i>             | Increased in colon (**)          | No significant differences                              |
| <b>Endothelium</b>                | <i>PECAM1, CDH5, CLDN5</i>               | Cycling       | N/A                          | Endothelium G2M-phase (46)            | <i>MKI67, CENPF, TOP2A</i>          | No locational preference         | Decreases over time in colon, TI and overall            |
|                                   |                                          |               |                              | Endothelium S-phase (47)              | <i>PCLAF, TYMS, GINS2</i>           | No locational preference         | Decreases over time in colon and overall                |
|                                   |                                          | Arterial      | <i>GJA4, IGFBP3,, UNC5B</i>  | Arterial (L) (48)                     | <i>HEY1, GJA5, ITGB4</i>            | No locational preference         | Increases over time in colon and overall                |
|                                   |                                          |               |                              | Arterial (M) (49)                     | <i>UNC5B, DLL4, PRND</i>            | No locational preference         | Increases over time in colon                            |
|                                   |                                          |               |                              | Arterial (CP) (50)                    | <i>VWA1, AFG1L, EDNRB</i>           | No locational preference         | Increases over time in colon, TI and overall            |
|                                   |                                          |               |                              | Arterial (CP) 2 (51)                  | <i>CHST1, LGALS1, IGFBP3</i>        | No locational preference         | Decreases over time in colon and overall                |
|                                   |                                          | Venous        | <i>MADCAM1, APLNR, PRCP</i>  | Venous (L) (52)                       | <i>ACKR1, VWF, ADGRG6</i>           | No locational preference         | Increases over time in colon and overall                |
|                                   |                                          |               |                              | Venous (M) 1 (53)                     | <i>LRG1, PLVAP, STMN1(-)</i>        | No locational preference         | Increases over time in colon, TI and overall            |
|                                   |                                          |               |                              | Venous (M) 2 (54)                     | <i>CALCRL, APLNR, PRCP</i>          | No locational preference         | Decreases over time overall                             |
|                                   |                                          |               |                              | Venous (CP) 1 (55)                    | <i>CCL2, CD69, RGCC</i>             | No locational preference         | Decreases over time in colon and overall                |
|                                   |                                          |               |                              | Venous (CP) 2 (56)                    | <i>LDHB, JUNB(-), ZFP36(-)</i>      | No locational preference         | Decreases over time in colon, TI and overall            |
|                                   |                                          | Lymphatic     | N/A                          | Lymphatic (57)                        | <i>LYVE1, PROX1, RELN</i>           | No locational preference         | Increases over time in colon and overall                |
| <b>Pericytes</b>                  | <i>KCNJ8, ABCG9, RGS5, CSP4G</i>         | Cycling       | N/A                          | Pericyte G2M-phase (58)               | <i>MKI67, CENPF, TOP2A</i>          | No locational preference         | Decreases over time in TI and overall                   |
|                                   |                                          |               | N/A                          | Pericyte S-phase (59)                 | <i>PCLAF, TYMS, GINS2</i>           | No locational preference         | Decreases over time in colon and overall                |
|                                   |                                          | Pericytes     | See compartment genes        | Pericyte progenitors (60)             | <i>THBS1, MBP,CEBPD</i>             | No locational preference         | Decreases over time in colon and overall                |
|                                   |                                          |               |                              | Undifferentiated pericytes (61)       | <i>CYGB, NFKBIA, TESC</i>           | No locational preference         | Increases over time in colon and overall                |
|                                   |                                          |               |                              | WNT6+ pericytes (62)                  | <i>WNT6, GPAT2, THBS1(-)</i>        | No locational preference         | Increases over time in colon and overall                |
|                                   |                                          |               |                              | Angiogenic pericyte (63)              | <i>PROCR, EBF2, THBS4</i>           | Increased in colon (**)          | Increases over time in colon and overall                |
|                                   |                                          |               |                              | BMPER+ pericytes (64)                 | <i>BMPER, CYGB, SPON2</i>           | No locational preference         | Increases over time in colon, TI and overall            |
|                                   |                                          |               |                              | Contractile pericyte (65)             | <i>ADIRF, MYH11, ACTA2</i>          | No locational preference         | Increases over time in colon and overall                |
| <b>Neural</b>                     | <i>PHOX2B, HAND2, TUBB2B</i>             | Cycling       | N/A                          | Neural G2M & S-Phase (66)             | <i>MKI67, CENPF, TOP2A</i>          | No locational preference         | Decreases in time in colon and overall                  |
|                                   |                                          | Glial         | <i>S100B, SOX10, PLP1</i>    | Lymphoid associated glial (67)        | <i>FGL2, GFRA3, RXRG</i>            | Increased in colon (**)          | Increases over time in colon and overall                |
|                                   |                                          |               |                              | Intraganglionic glial (68)            | <i>ENTPD2, SPRY1, SOX6</i>          | No locational preference         | Increases over time in colon, TI and overall            |
|                                   |                                          |               |                              | Submucosal glia (69)                  | <i>CEBPD, SOCS3, ZFP36</i>          | No locational preference         | Increases in time in colon and overall                  |
|                                   |                                          |               |                              | Differentiating submucosal glial (70) | <i>BCAN, APOE, LAMP5</i>            | No locational preference         | Increases over time in colon and overall                |
|                                   |                                          |               |                              | Glial progenitors (71)                | <i>PHOX2B, HMGA2, CTGF</i>          | No locational preference         | Decreases over time in colon, TI and overall            |
|                                   |                                          | Neuronal      | <i>ELAVL4, CHRNA3, GAP43</i> | ENS progenitors(72)                   | <i>DLL3, DLL1, ELAVL4(low)</i>      | No locational preference         | Decreases over time in colon and overall                |
|                                   |                                          |               |                              | Neuroendocrine 1 (73)                 | <i>NEUROD6, SCGN, SSSTR2, NPY2R</i> | No locational preference         | Increases in time in colon and overall                  |
|                                   |                                          |               |                              | Neuroendocrine 2 (74)                 | <i>DGKG, SST, KCTD16</i>            | No locational preference         | Increases in time in colon, TI and overall              |

|        |                     |                         |                                     |                                         |                                         |                                     |                                                                           |
|--------|---------------------|-------------------------|-------------------------------------|-----------------------------------------|-----------------------------------------|-------------------------------------|---------------------------------------------------------------------------|
|        |                     |                         |                                     | Excitory motor neuron (75)              | <i>CASZ1, RAMP1, GFRA2</i>              | No locational preference            | No significant differences                                                |
|        |                     |                         |                                     | Inhibitory motor neuron precursor (76)  | <i>SCGN, CRABP1, NOS1, VIP, ADCYAP1</i> | No locational preference            | Decreases over time in T1 and overall                                     |
|        |                     |                         |                                     | Inhibitory motor neuron (77)            | <i>NOS1, VIP, HTR2B, ETV1</i>           | No locational preference            | Increases then decreases in time in colon and overall                     |
|        |                     |                         |                                     | Interneuron (78)                        | <i>PENK, ACHE, TAC1, ONECUT2</i>        | No locational preference            | Decreases over time                                                       |
| Immune | PTPRC               | Macrophage              | <i>MERTK, CTSC, CTSD, CD14 (hi)</i> | Macrophage (79)                         | <i>FGL2, HES1, SLC40A1</i>              | Increased in colon (*)              | Increases over time in colon and overall                                  |
|        |                     |                         |                                     | Macrophage SPP1+ (80)                   | <i>SPP1, RNASE1, FOLR2</i>              | Increased in colon (*)              | No significant differences                                                |
|        |                     | Monocyte                | <i>CD14 (lo)</i>                    | Monocyte (81)                           | <i>FCN1, S100A8, CLEC12A</i>            | No locational preference            | No significant differences                                                |
|        |                     | Dendritic cell          | <i>ETV6, FLT3</i>                   | pDCs (82)                               | <i>IL3RA, LILRA4, PTCRA</i>             | No locational preference            | No significant differences                                                |
|        |                     |                         |                                     | DCs (83)                                | <i>CD207, BATF3, CD1D</i>               | No locational preference            | No significant differences                                                |
|        |                     | Adaptive lymphoid cells | <i>CD19, EBF1, PAX5</i>             | Pre B Cell (84)                         | <i>IGLL1, VPREB1, RAG1</i>              | No locational preference            | No significant differences                                                |
|        |                     |                         |                                     | B cell (85)                             | <i>BANK1, CD79B, IGHD</i>               | No locational preference            | Increases over time in colon, T1 and overall                              |
|        |                     | Innate lymphoid cells   | <i>ETS1, TOX</i>                    | Naïve T Cell (86)                       | <i>CD3D, CD3G, CD27</i>                 | No locational preference            | Increases over time in colon, T1 and overall                              |
|        |                     |                         |                                     | NKs and γδ (87)                         | <i>CD8A, IL2RB, TRDC</i>                | Increased in small intestine (*)    | No significant differences                                                |
|        |                     |                         |                                     | Type 3 ILCs (88)                        | <i>IL7R, ID2, RORC, KRT86</i>           | No locational preference            | Increases over time in colon and overall                                  |
|        |                     | Eosinophils             | N/A                                 | Mast (89)                               | <i>TPSAB1, CPA3, MS4A2</i>              | No locational preference            | Increases over time in T1 and overall. Decreases in colon.                |
|        |                     | Cycling                 | N/A                                 | Immune Cell cycle (90)                  | <i>MKI67, CENPF, TOP2A</i>              | No locational preference            | Decreases over time in colon, T1 and overall                              |
| Muscle | MYH11, ACTG2, TAGLN | Cycling                 | N/A                                 | Muscularis G2M phase (91)               | <i>MKI67, CENPF, TOP2A</i>              | No locational preference            | Decreases then increases over time in colon                               |
|        |                     |                         |                                     | Muscularis S-phase (92)                 | <i>PCLAF, TYMS, GINS2</i>               | No locational preference            | No significant differences                                                |
|        |                     | Interstitial Cells      | <i>KIT</i>                          | Interstitial Cells of Cajal / ICCs (93) | <i>ANO1, ETV1, SPON2</i>                | No locational preference            | No significant differences                                                |
|        |                     |                         |                                     | PDGFRA+ cells (94)                      | <i>PDGFRA, ITGA8, BMP4</i>              | No locational preference            | Decreases over time in colon and overall                                  |
|        |                     | Outer muscularis        | <i>FOXF2(-)</i>                     | OM (95)                                 | <i>BCHE, CAPN3, IGFBP5</i>              | No locational preference            | Increases over time in colon and overall                                  |
|        |                     | Inner muscularis (IM)   | <i>FOXF2, ACTC1</i>                 | Proximal IM (96)                        | <i>IGFBP2, HOXC8, IGFBP7</i>            | Increased in small intestine (****) | No significant differences                                                |
|        |                     |                         |                                     | Distal IM (97)                          | <i>PNCK, MORN5, AHNAK2</i>              | Increased in colon (***)            | Increases over time in colon and overall                                  |
|        |                     |                         |                                     | Proximal MM (98)                        | <i>PLCG2, NPNT, IGF1</i>                | Increased in small intestine (****) | No significant differences                                                |
|        |                     |                         |                                     | Distal MM (99)                          | <i>PLN, MOXD1, TMEM158</i>              | Increased in colon (***)            | Increases over time in colon and overall                                  |
|        |                     |                         |                                     | IM PMAIP1+ (100)                        | <i>PMAIP1, HMGCS1, KRT17</i>            | No locational preference            | Increases then decreases over time in colon and overall. Increases in T1. |
|        |                     | IM progenitor           | N/A                                 | IM progenitor (101)                     | <i>HOXC5, PLPP2, MYOCD</i>              | No locational preference            | Decreases over time overall.                                              |
